# Supplementary material
Source: MDPI journal article supplement (https://www.mdpi.com/2071-1050/15/13/10119)
Supplement: s1 [file s1 › sustainability-2433225-supplementary.pdf]

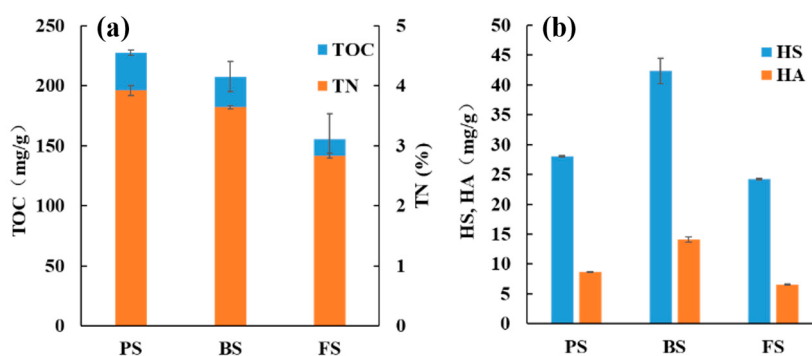

**Figure. S1.** (a) initial contents of TOC and TN in PS, BS and FS, respectively; (b) initial contents of HS and HA in PS, BS and FS, respectively

**Table S1** Main characteristics of the Fourier transform infrared (FTIR) spectra of HAs during different composting process

| Band (cm <sup>-1</sup> )      |                          | Chemical structures (assignment)          |
|-------------------------------|--------------------------|-------------------------------------------|
| 3397–3411 (cm <sup>-1</sup> ) | O–H stretch <sup>7</sup> | alcohols and phenols                      |
| 2915–2961 cm <sup>-1</sup>    | C–H stretch <sup>5</sup> | CH <sub>3</sub> and CH <sub>2</sub>       |
| 2522–2644 cm <sup>-1</sup>    | O–H stretch <sup>6</sup> | hydrogen-bonded carboxylic group          |
| 1716–1728 cm <sup>-1</sup>    | C=O stretch              | ketone, carboxylic acids                  |
| 1616–1631 cm <sup>-1</sup>    | C=C stretch              | alkenes and aromatic rings                |
| 1506–1545 cm <sup>-1</sup>    | N–H bend                 | N–H structures, Amine                     |
| 1452–1459 cm <sup>-1</sup>    | C–H bend <sup>5</sup>    | CH <sub>3</sub> and CH <sub>2</sub>       |
| 1410 cm <sup>-1</sup>         | O–H bend                 | carboxylic groups                         |
| 1375 cm <sup>-1</sup>         | C–H bend <sup>4</sup>    | CH <sub>3</sub>                           |
| 1260–1240 cm <sup>-1</sup>    | C–O stretch <sup>3</sup> | aromatic/unsaturated ethers, Amide III    |
| 1095/1030 cm <sup>-1</sup>    | C–O stretch <sup>2</sup> | alcohols, aliphatic ethers                |
| 805 cm <sup>-1</sup>          | C–H bend <sup>1</sup>    | tri- and tetra-substituted aromatic rings |
